# Supplementary material
Source: PubMed Central journal article supplement (PMC4809671)
Supplement: NIHMS767836-supplement-Suppl.pdf [file NIHMS767836-supplement-Suppl.pdf]

## **Supporting Information**

### **Material and Methods**

### **Supporting Figure Legends**

#### **Supporting Figures**

**Supporting Figure 1.** HFD treatment increases both hepatic and plasma triglycerides

**Supporting Figure 2.** Fatty acid treatment leads to an increase in lipid content and miR-24 in HepG2 Cells.

**Supporting Figure 3.** The crosstalk of miR-24 with *Insig1* occurs in HepG2 cells.

**Supporting Figure 4.** The interaction between miR-24 and *Insig1* plays an important role in lipid accumulation in HepG2 cells treated with fatty acid.

**Supporting Figure 5.** *Insig1* mediates the inhibitory effects of miR-24 inhibitor on SREBP processing in HepG2 cells.

**Supporting Figure 6.** miR-24 knockdown prevents lipid accumulation in dietary obese mice.

#### **Supporting Tables**

**Supporting Table 1.** 411 Down-regulated Genes in Livers of Human Patients with NAFLD/NASH.

**Supporting Table 2.** 48 Potential Target Genes of miR-24.

**Supporting Table 3.** Three Down-regulated Genes in Livers of Human NAFLD/NASH that have Binding Motifs for miR-24.

**Supporting Table 4.** Primers for quantitative RT-PCR

**Supporting Table 5.** Comparison of Mice Treated with miR-24-ASO and miR-24-MM-ASO

## Material and Methods

***Serum Liver Function Tests.*** Quantitative determination of ALT, glucose, cholesterol and triglycerides was carried out with an ADVIA 1800 automated clinical chemistry system (Siemens) in the Clinical Laboratories at the University of Minnesota Medical Center and the University of California, San Francisco.

***Fatty Acid Treatment of HepG2 Cells.*** HepG2 cells were used in this study due to their high levels of SREBP1c and SREBP2. Oleate treatment of HepG2 cells was carried out as previously described with minor revision.<sup>35</sup> Specifically,  $1 \times 10^5$  cells were plated in 6-well plate with DMEM medium. Twenty four hours later, HepG2 cells were then treated with either the control medium (DMEM containing 1% Bovine Serum Albumin), BEC medium (DMEM containing 1% BSA and 0.30% Ethanol) or media containing the fatty acid oleate (Sodium Oleate in 1% BSA/DMEM in BEC medium). The cells were cultured for another 24 hours, and lipid accumulation was determined by Nile Red Staining.

***Fatty Acid Treatment of Human Hepatocytes.*** Human hepatocytes were obtained from ZenBio, Inc. and cultured according to the manufacturer's protocol. Briefly,  $2.5 \times 10^5$  human hepatocytes were plated in 4-well collagen I coated chamber slides. Twenty-four hours later, the hepatocytes were treated with either the control medium (DMEM containing 1% Bovine Serum Albumin), BEC medium (DMEM containing 1% BSA and 0.30% Ethanol) or 0.5 mM oleate medium (Sodium Oleate in 1% BSA/DMEM in BEC medium). The cells were cultured for another 24 hours, and lipid accumulation was determined by Nile Red Staining.

***Lipid Accumulation Assay.*** The lipid content in both human hepatocytes and HepG2 cells was determined using Nile Red, a vital lipophilic dye (9-diethylamino-5H-benzo [alpha] phenoxazine-5-one), which has been shown to selectively stain intracellular lipid droplets. After 24 hours of treatment, cell monolayers were washed twice with PBS and incubated for 30 minutes with Nile Red solution at a

final concentration of 1mg/L in PBS at 37°C. Monolayers were washed thereafter with PBS and the fluorescence was determined using a microfluorimeter.

***Immunostaining.*** For Oil-Red-O and Nile-Red staining, 10 µm-thick sections were cut with a Leica CM3050 S cryostat from freshly frozen liver samples, air-dried, and fixed in 10% formalin. After washing, sections were stained with an ORO (Sigma)/60% isopropanol (Fisher) solution. Slides were counterstained with DAPI. Hematoxylin and eosin (H&E) as well as Oil Red O-stained liver specimens were examined by light microscopy, but Nile-Red stained liver sections were evaluated by fluorescence microscopy. For *Insig1* immunostaining, paraffin-embedded liver samples were sectioned and stained with rabbit anti-*Insig1* antibody at 1:100 dilutions. For fluorescence microscopy, goat anti-rabbit antibody was conjugated with Alexa Fluor 594 (Invitrogen) and used at a 1:500 dilution. Nuclear DNA was stained with 300 nM DAPI (Millipore).

***Lipid and Lipoprotein Analysis.*** Hepatic triglyceride and cholesterol content were enzymatically measured in liver lysates using L-type TG H triglyceride kit and Cholesterol E Kits, respectively, according to the manufacturer's protocols (Wako Chemicals).

***Insig1 3' UTR Luciferase Reporter Vector Construction and Luciferase Assay.*** To generate the luciferase reporter vectors, *Insig1* 3' UTR was amplified by PCR from human cDNA, and inserted into the pMiR-Report vector between HindIII and SacI sites (Ambion). All vector constructions were confirmed by sequencing. Twenty-four hours before transfection,  $5 \times 10^4$  cells were plated per well in a 24-well plate. Then, 200 ng of *Insig1* 3' UTR reporter construct, different concentrations of miR-24 mimic and 30 ng of  $\beta$ -gal plasmid pSV- $\beta$ -Galactosidase Control Vector (Promega) were transfected using Lipofectamine 2000<sup>25</sup> (Invitrogen). Twenty four hours after transfection, luciferase and  $\beta$ -galactosidase assays were performed using the Luciferase Assay System and Beta-Glo<sup>®</sup> Assay System (Promega). Luciferase activities were normalized to galactosidase activities; wells were transfected in triplicate; and each well was assayed in triplicate.

**Quantitative Reverse Transcription-PCR (qRT-PCR).** Total RNA was isolated with Trizol and treated with DNase I (Ambion) to eliminate genomic DNA. 1 µg RNA was used for cDNA synthesis with Superscript III reverse transcription reagent (Invitrogen). PCR amplification was performed at 50°C for 2 minutes and 95°C for 10 minutes, followed by 40 cycles at 95°C for 15 seconds and 60°C for 1 minute in a 7900 real time-PCR system with SYBR green (Applied Biosystems). For each sample, β-actin, GAPDH or 18S rRNA levels were used to normalize target gene expression. Primers for qRT-PCR were designed with Primer Express software (Applied Biosystems). For miRNA analysis, RNA was isolated with the miRNeasy kit (Qiagen). Ten ng RNA were used for miRNA-specific cDNA synthesis with the TaqMan MicroRNA Reverse Transcription Kit and Taqman MicroRNA Assays (all Applied Biosystems). PCR amplification was performed at 95°C for 10 minutes, followed by 40 cycles at 95°C for 15 seconds and 60°C for 1 minute in a 7900 real time-PCR system (Applied Biosystems). The small RNAs Sno202 and RNU6 were used to normalize target miRNA expression. Relative changes in gene and miRNA expression were determined using the  $2^{-\Delta\Delta Ct}$  method.<sup>37</sup> Primers used for quantitative RT-PCR were listed in Supporting Table 4.

**miR-24 In Situ hybridization.** Liver were fixed by overnight immersion in phosphate buffered saline (PBS) containing 4% paraformaldehyde (4% PFA) at 4°C, washed in PBS, dehydrated in 15% sucrose, and embedded in OCT (Fisher). Exiqon microRNA *in situ* hybridization kit was used according to the manufacturer's protocol. Anti-miR-24 LNA and control LNA probes were used at concentrations of 25 nM and incubated at hybridizing temperature of 55°C. Anti-DIG-AP antibodies (Roche) was used at 1:100 dilution and incubated at RT for 1 hour. Positive *in situ* hybridization signals are visualized in purple, while pink depicts DAPI nuclear stain.

**Western Blot Analysis.** Western blot was performed following standard procedures. Insig1, SREBP1c and SREBP2 primary antibodies were purchased from Cell Signaling and Abcam; and

binding was visualized using SuperSignal west femto maximum sensitivity substrate (Cat # 34095, Thermo Fisher Scientific Inc.).

***Statistical Analysis.*** All the experiments were repeated at least three times and the error bars represent the standard error of the mean (SE). Statistical analyses were carried out using two-tailed Student's t-test;  $p < 0.05$  was considered statistically significant.

## Supporting Figure and Table Legends

**Supporting Fig. 1.** HFD treatment increases both hepatic and plasma triglycerides. (A, B) Nile Red and H&E staining showing that HFD treatment led to increased hepatic lipid accumulation in mice. (C, D) HFD treatment led to high levels of hepatic and plasma triglycerides. Lipids were extracted from the livers of mice treated with standard diet or HFD and triglycerides measured using a colorimetric assay. Data are expressed as mean  $\pm$  SD. Representative histological images are shown.  $*P < 0.01$  versus controls ( $n = 4-6$  per group).

**Supporting Fig. 2.** Fatty acid treatment leads to an increase in lipid content and miR-24 in HepG2 Cells. (A, B) Oleate treatment led to an increase in lipid content in HepG2 cells, as determined fluorimetrically using Nile Red, a selective stain for intracellular lipid droplets. (C) Oleate treatment increased miR-24 expression in HepG2 cells. Data represent mean  $\pm$  SEM.  $*P < 0.05$ .

**Supporting Fig. 3.** The crosstalk of miR-24 with *Insig1* occurs in HepG2 cells. (A) miR-24 mimic transfection into HepG2 cells inhibited expression levels of endogenous *Insig1*. (B) Knockdown of miR-24 by transfection of inhibitors into HepG2 cells caused an increase in endogenous *Insig1* mRNA levels. (C) Western blot analysis further confirmed that miR-24 repressed but miR-24 inhibitor induced protein levels of endogenous *Insig1*. *ImageJ* program was used to *quantify* western blot bands. Data represent mean  $\pm$  SEM.  $*P < 0.05$ .

**Supporting Fig. 4.** The interaction between miR-24 and *Insig1* plays an important role in lipid accumulation in HepG2 cells treated with fatty acid. (A) Q-RT-PCR revealed that oleate treatment led to up-regulated miR-24 and decreased *Insig1*. (B, C) Oleate treatment increased lipid accumulation in HepG2 cells as determined fluorimetrically using Nile Red. (D) miR-24 inhibitor transfection into oleate-treated HepG2 cells led to decreased miR-24 and increased *Insig1* as revealed by qRT-PCR. (E,

F) Higher levels of *Insig1* due to miR-24 knockdown repressed lipid accumulation in HepG2 cells, as determined fluorimetrically using Nile Red. ata represent mean  $\pm$  SEM. \* $P < 0.05$ .

**Supporting Fig. 5.** *Insig1* mediates the inhibitory effects of miR-24 inhibitor on SREBP processing in HepG2 cells. (A) miR-24 knockdown in HepG2 cells led to increased protein levels of *Insig1*, which subsequently caused a decrease in nuclear SREBP1c and SREBP2. Additional knockdown of induced *Insig1* with siRNA restored SREBP1c and SREBP2. HepG2 cells were treated with oleate to induce miR-24, and then miR-24-ASO was transfected to knock down the upregulated miR-24. SREBP1c, SREBP2 and *Insig1* protein were determined by western blot. *ImageJ* program was used to *quantify* western blot bands. (B, C) miR-24 knockdown prevented lipid accumulation in HepG2 cells, and additional knockdown of *Insig1* rescued the effect of miR-24-ASO. The lipid content in the cultured HepG2 cells was determined fluorimetrically using Nile Red. (D) Deletion of miR-24 increased expression of *Insig1*, which subsequently led to a significant decrease in mRNA levels of *SCD1*, *FASN*, *GPAT* and *HMGCR*. (E) Overexpression of miR-24 repressed expression of *Insig1*, which subsequently caused an increase in mRNA levels of lipogenic genes including *SCD1*, *FASN*, *GPAT* and *HMGCR*. MRNA levels of *SCD1*, *FASN*, *GPAT* and *HMGCR* were measured by qRT-PCR. ata represent mean  $\pm$  SEM. \* $P < 0.05$ .

**Supporting Fig. 6.** miR-24 knockdown prevents lipid accumulation in dietary obese mice. (A) *In situ* staining revealed that miR-24 was significantly knocked down after miR-24-ASO injection into dietary obese mice. Positive *in situ* hybridization signals are visualized in purple, while pink depicts DAPI nuclear stain. (B) MiR-24 knockdown subsequently led to an increase of *Insig1*, as revealed by immunostaining. (C, D) Nile red and H&E staining showed that miR-24 knockdown prevented hepatic lipid accumulation in dietary obese mice.

**Supporting Table 1.** 411 Down-regulated Genes in Livers of Human Patients with NAFLD/NASH.

**Supporting Table 2.** 48 Potential Target Genes of miR-24. To determine the potential role of miR-24 in regulating lipid metabolism within hepatocytes, we predicted target genes using TargetScan and Pictar and starBase as described in Materials and Methods. To increase the prediction accuracy, we only selected overlapped hits from both Target and PicTar algorithms as well as those confirmed by Ago HITS-CLIP (high-throughput sequencing of RNAs isolated by crosslinking immunoprecipitation [HITS-CLIP] from Argonaute protein complex). Such an approach identified 48 hits that are potential target genes of miR-24.

**Supporting Table 3.** Three Down-regulated Genes in Livers of Human NAFLD/NASH that have Binding Motifs for miR-24. We compared 411 down-regulated genes with 48 genes that contain miR-24 binding sites, allowing us to identify three down-regulated genes in livers of human individuals with NAFLD that have binding motifs for miR-24. Furthermore, we performed Gene Oncology analysis using PathwayStudio (Elsevier) and GoMiner and observed that *Insig1* is a potential regulator of lipid accumulation, leading us to focus on the role of the crosstalk between miR-24 and *Insig1* in NAFLD and hypertriglyceridemia.

**Supporting Table 4.** Primers for quantitative RT-PCR.

**Supporting Table 5.** Comparison of Mice Treated with miR-24-ASO and miR-24-MM-ASO. In detail, C57B/16 wild type mice were kept on normal chow until 8 weeks of age and then maintained on HFD until 16 weeks of age. At that time, the mice were given miR-24-ASO (25 mg/kg, tail-vein injection) until 20 weeks. The C57Bl/6 mice maintained on HFD and treated with miR-24-MM-ASO served as control. Mice were fasted for 8 hours before liver and blood collection. Data represent mean  $\pm$  SEM. \* $P < 0.05$  for level of statistical significance between miR-24-ASO and miR-24-MM-ASO treated mice.



# Supporting Figure 1

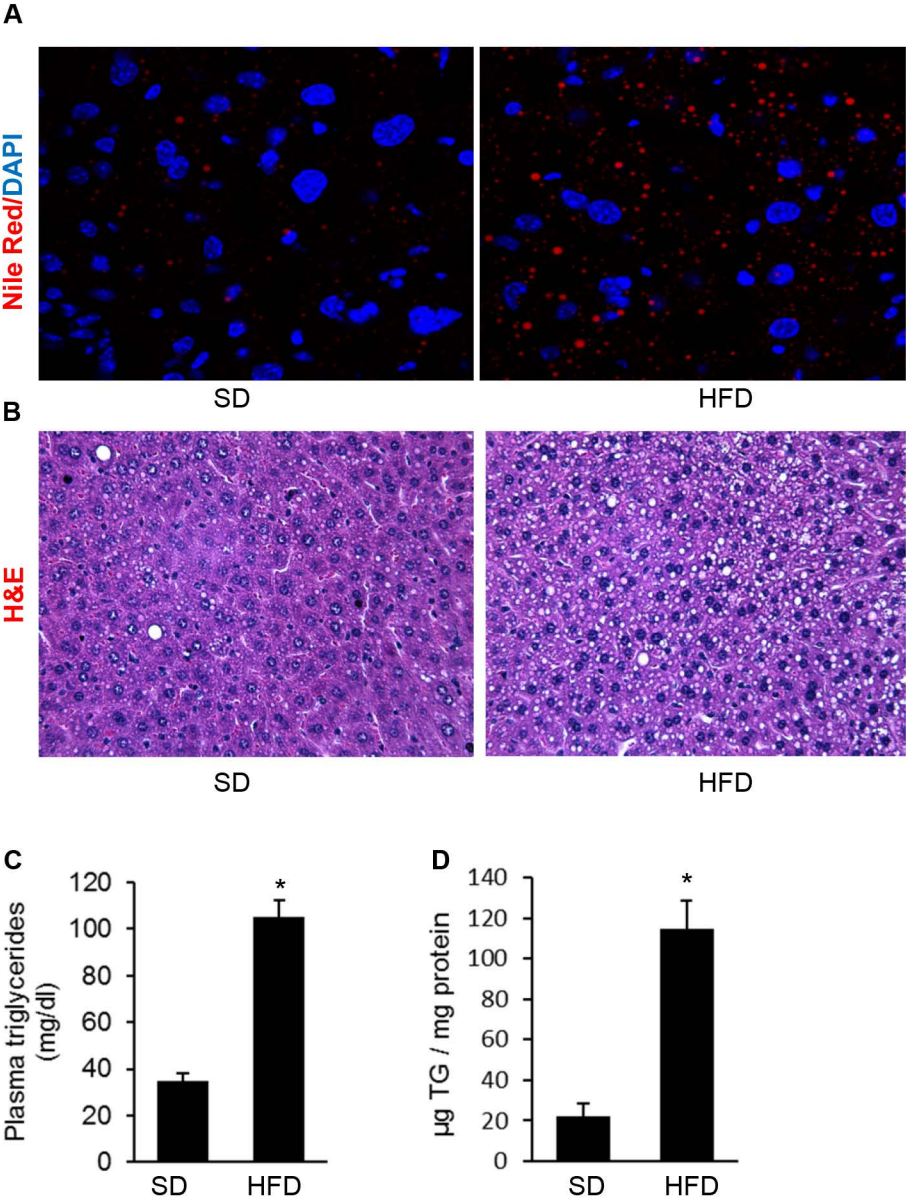

## Supporting Figure 2

**A**

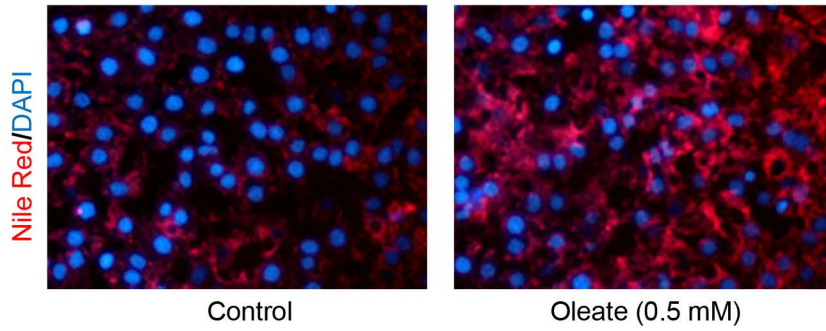

**B**

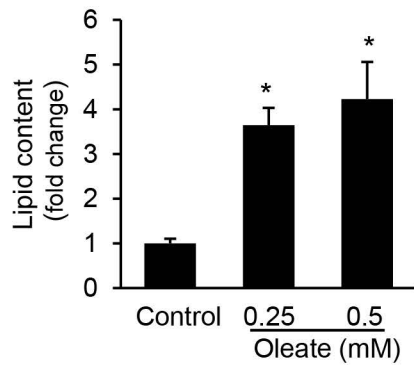

**C**

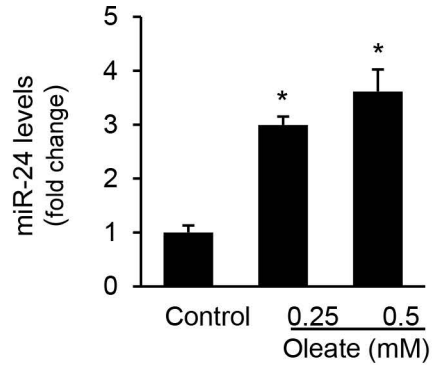

# Supporting Figure 3

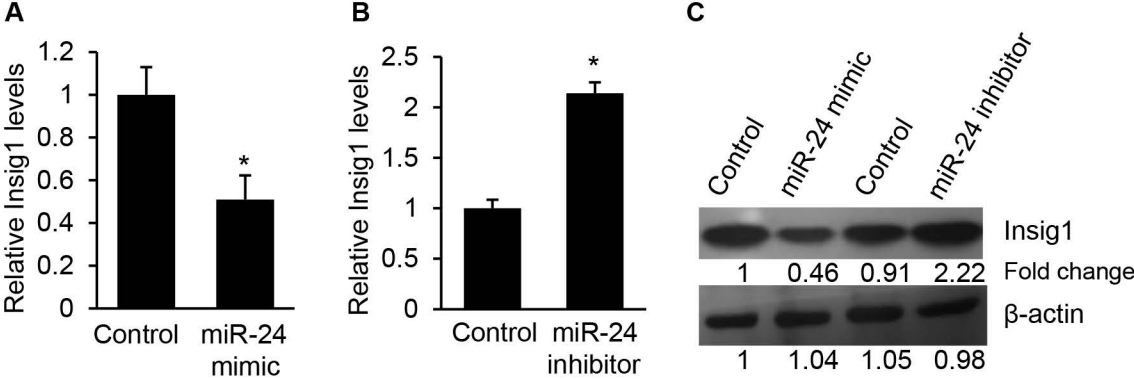

## Supporting Figure 4

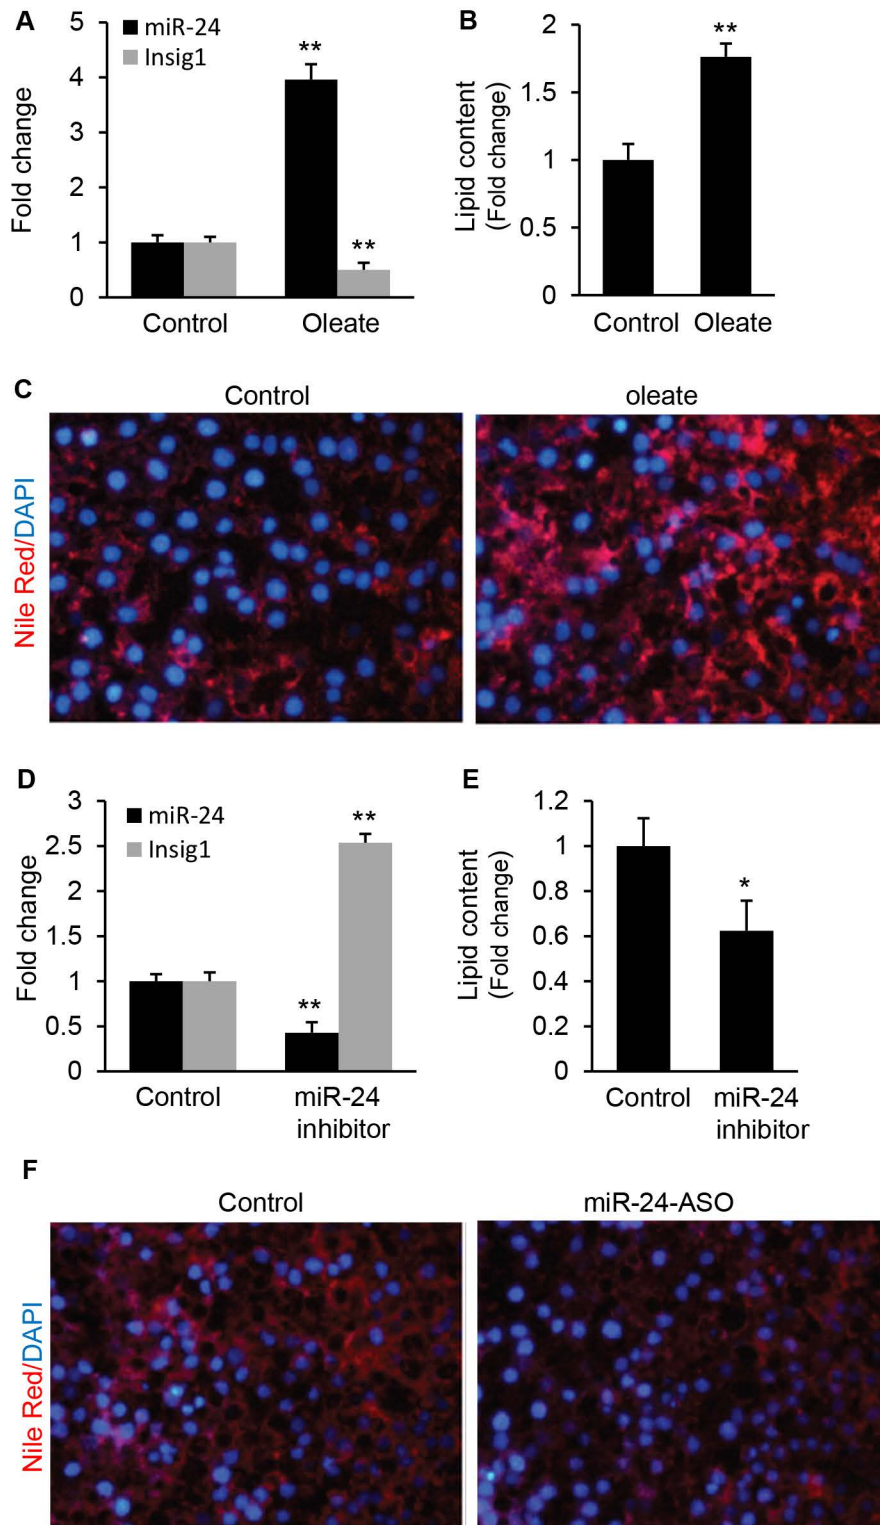

## Supporting Figure 5

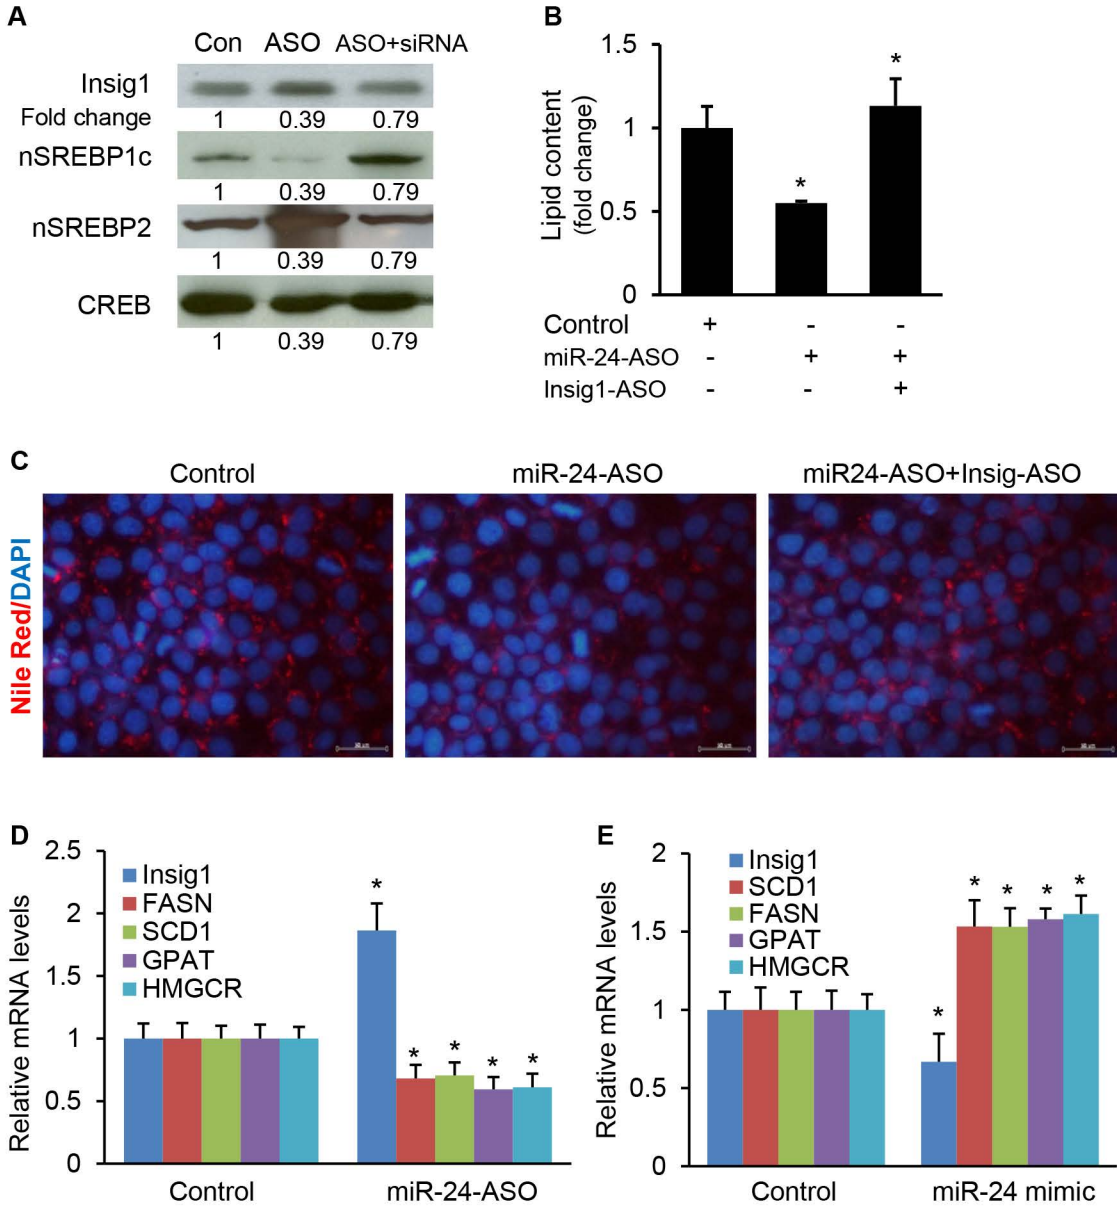

# Supporting Figure 6

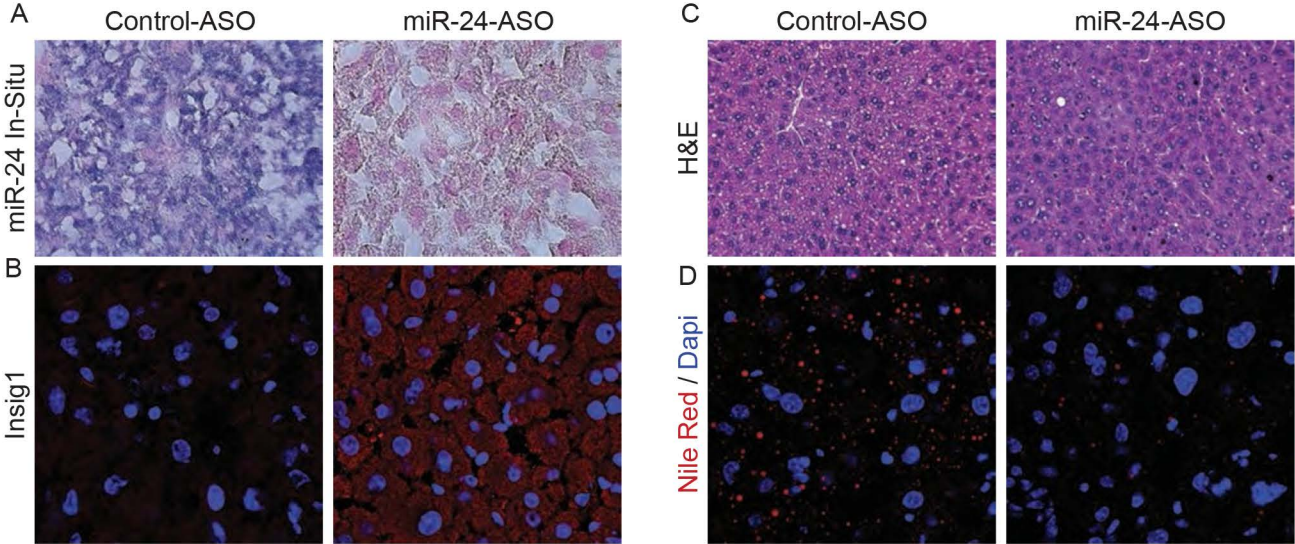

**Supporting Table 1. 411 Down-regulated Genes in Livers of Human Patients with NAFLD/NASH.**

| Probe ID | LogFC<br>(NAFLD/Normal) | P Value    | Gene symbol   | Gene Name                                                                                                                             |
|----------|-------------------------|------------|---------------|---------------------------------------------------------------------------------------------------------------------------------------|
| 8123936  | -0.5253034              | 0.04978851 | NEDD9///NEDD9 | neural precursor cell expressed, developmentally down-regulated 9///neural precursor cell expressed, developmentally down-regulated 9 |
| 7895081  | -0.6305263              | 0.04943983 |               |                                                                                                                                       |
| 7979179  | -0.5030774              | 0.04904768 | ERO1L         | ERO1-like ( <i>S. cerevisiae</i> )                                                                                                    |
| 7895873  | -0.5563492              | 0.04863099 |               |                                                                                                                                       |
| 7912706  | -0.6998363              | 0.04848657 | EPHA2         | EPH receptor A2                                                                                                                       |
| 7895267  | -0.7159641              | 0.04827798 |               |                                                                                                                                       |
| 7896426  | -0.783815               | 0.04822682 |               |                                                                                                                                       |
| 8144685  | -0.5035525              | 0.04757799 |               |                                                                                                                                       |
| 7894004  | -0.529836               | 0.04729158 |               |                                                                                                                                       |
| 7893082  | -0.717114               | 0.04670257 |               |                                                                                                                                       |
| 7892688  | -0.5435441              | 0.04664537 |               |                                                                                                                                       |
| 7892501  | -0.9988008              | 0.04638545 |               |                                                                                                                                       |
| 7969414  | -0.7581077              | 0.04518542 | KLF5          | Kruppel-like factor 5 (intestinal)                                                                                                    |
| 7894599  | -0.8792485              | 0.04515501 |               |                                                                                                                                       |
| 8134030  | -0.5011774              | 0.04499696 | STEAP1        | six transmembrane epithelial antigen of the prostate 1                                                                                |
| 7897449  | -0.5138176              | 0.04472003 | SPSB1         | splA/ryanodine receptor domain and SOCS box containing 1                                                                              |
| 8131957  | -0.6298414              | 0.04394286 | SNX10         | sorting nexin 10                                                                                                                      |
| 7981984  | -0.98275                | 0.04328921 | SNORD116-18   | small nucleolar RNA, C/D box 116-18                                                                                                   |
| 7893003  | -0.5322347              | 0.04322103 |               |                                                                                                                                       |
| 8039389  | -0.5859818              | 0.04297888 | PTPRH         | protein tyrosine phosphatase, receptor type, H                                                                                        |
| 7964927  | -1.3066047              | 0.04199953 | TSPAN8        | tetraspanin 8                                                                                                                         |
| 8075477  | -0.5514647              | 0.0413534  | RNF185        | ring finger protein 185                                                                                                               |
| 8049187  | -0.8916716              | 0.04120592 | EFHD1         | EF-hand domain family, member D1                                                                                                      |
| 7894199  | -0.979366               | 0.04083466 |               |                                                                                                                                       |
| 7964832  | -0.5737636              | 0.04019986 |               |                                                                                                                                       |
| 7893173  | -0.6933095              | 0.04011849 |               |                                                                                                                                       |
| 7959085  | -0.7702644              | 0.04010702 |               |                                                                                                                                       |

|         |            |            |                 |                                                                                                      |
|---------|------------|------------|-----------------|------------------------------------------------------------------------------------------------------|
| 8013112 | -1.3398585 | 0.04006096 | RASD1           | RAS, dexamethasone-induced 1                                                                         |
| 8106403 | -0.6635718 | 0.03965488 | F2RL1           | coagulation factor II (thrombin) receptor-like 1                                                     |
| 7896398 | -0.549868  | 0.03958533 |                 |                                                                                                      |
| 7998927 | -0.7478878 | 0.03941006 |                 |                                                                                                      |
| 8084963 | -0.5474177 | 0.03885472 | PAK2            | p21 protein (Cdc42/Rac)-activated kinase 2                                                           |
| 8040516 | -0.5445119 | 0.03878738 | MFSD2B          | major facilitator superfamily domain containing 2B                                                   |
| 7957654 | -0.5326827 | 0.03870544 | AMDHD1          | amidohydrolase domain containing 1                                                                   |
| 8032834 | -0.618986  | 0.03858141 | LRG1            | leucine-rich alpha-2-glycoprotein 1                                                                  |
| 7984660 | -0.6727377 | 0.03807913 |                 |                                                                                                      |
| 7920256 | -0.5233955 | 0.03786015 |                 |                                                                                                      |
| 8069532 | -0.6052885 | 0.03773282 | HSPA13          | heat shock protein 70kDa family, member 13                                                           |
| 7892953 | -0.5827467 | 0.03749064 |                 |                                                                                                      |
| 7898693 | -0.6306742 | 0.03689928 | ALPL            | alkaline phosphatase, liver/bone/kidney                                                              |
| 8116579 | -0.6189169 | 0.03671688 | FOXQ1           | forkhead box Q1                                                                                      |
| 8025402 | -1.0413115 | 0.03654429 | ANGPTL4         | angiopoietin-like 4                                                                                  |
| 7937772 | -0.5246209 | 0.03629419 | INS-IGF2///IGF2 | INS-IGF2 readthrough///insulin-like growth factor 2 (somatomedin A)                                  |
| 8175288 | -0.518977  | 0.03628981 | MOSPD1          | motile sperm domain containing 1                                                                     |
| 7909332 | -0.5284503 | 0.03614768 | CD55            | CD55 molecule, decay accelerating factor for complement (Cromer blood group)                         |
| 7896690 | -0.5267387 | 0.03602474 |                 |                                                                                                      |
| 8073007 | -0.5982432 | 0.03573051 | MAFF            | v-maf musculoaponeurotic fibrosarcoma oncogene homolog F (avian)                                     |
| 7895673 | -1.0051126 | 0.03530945 |                 |                                                                                                      |
| 7894788 | -0.500707  | 0.03529408 |                 |                                                                                                      |
| 8104369 | -0.5367299 | 0.03504226 | SRD5A1          | steroid-5-alpha-reductase, alpha polypeptide 1 (3-oxo-5 alpha-steroid delta 4-dehydrogenase alpha 1) |
| 7933872 | -0.752907  | 0.03499603 | EGR2            | early growth response 2                                                                              |
| 8003560 | -0.5147576 | 0.03472716 | DBNDD1          | dysbindin (dystrobrevin binding protein 1) domain containing 1                                       |
| 8139889 | -0.6199746 | 0.03469188 |                 |                                                                                                      |
| 7916609 | -1.2876438 | 0.03464845 | JUN             | jun proto-oncogene                                                                                   |
| 7981909 | -0.6000776 | 0.03427088 |                 |                                                                                                      |
| 7896608 | -0.5165406 | 0.0340204  |                 |                                                                                                      |



|         |            |            |                             |                                                                                             |
|---------|------------|------------|-----------------------------|---------------------------------------------------------------------------------------------|
| 8052022 | -0.5993708 | 0.03370402 |                             |                                                                                             |
| 8119620 | -1.1255306 | 0.0336937  | GNMT                        | glycine N-methyltransferase                                                                 |
| 7893723 | -0.9430944 | 0.033366   |                             |                                                                                             |
| 7924758 | -0.7582321 | 0.03288539 |                             |                                                                                             |
| 7893850 | -0.5541691 | 0.03244317 |                             |                                                                                             |
| 7935270 | -0.5386947 | 0.03227082 | BLNK                        | B-cell linker                                                                               |
| 7896079 | -0.870196  | 0.03214102 |                             |                                                                                             |
| 7919600 | -1.3179187 | 0.03211885 |                             |                                                                                             |
| 7978586 | -0.5280231 | 0.03191485 | CFL2                        | cofilin 2 (muscle)                                                                          |
| 7925342 | -0.5465499 | 0.0318838  | ERO1LB                      | ERO1-like beta ( <i>S. cerevisiae</i> )                                                     |
| 7926484 | -0.6020203 | 0.03174617 |                             |                                                                                             |
| 8107671 | -0.5548638 | 0.03157262 |                             |                                                                                             |
| 8070489 | -0.6389739 | 0.03133392 | RIPK4                       | receptor-interacting serine-threonine kinase 4                                              |
| 8136801 | -0.5173151 | 0.03120149 | PRSS3P2///PRSS3<br>///PRSS2 | protease, serine, 3 pseudogene 2///protease, serine, 3///protease, serine, 2<br>(trypsin 2) |
| 7893339 | -0.5229027 | 0.03067851 |                             |                                                                                             |
| 7978748 | -0.5244771 | 0.03039409 | FBXO33                      | F-box protein 33                                                                            |
| 7896378 | -0.7289568 | 0.03036867 |                             |                                                                                             |
| 8090277 | -0.5502488 | 0.02982736 | OSBPL11                     | oxysterol binding protein-like 11                                                           |
| 8155508 | -0.7373802 | 0.02957688 |                             |                                                                                             |
| 7984405 | -0.5312894 | 0.02956246 | C15orf61                    | chromosome 15 open reading frame 61                                                         |
| 7896533 | -0.6544285 | 0.0294178  |                             |                                                                                             |
| 8023727 | -0.5714076 | 0.02914503 | DSEL                        | dermatan sulfate epimerase-like                                                             |
| 7923596 | -0.5376735 | 0.02851715 | ETNK2                       | ethanolamine kinase 2                                                                       |
| 7893962 | -0.7120229 | 0.02830659 |                             |                                                                                             |
| 8149720 | -0.5739149 | 0.02764674 | EGR3                        | early growth response 3                                                                     |
| 8068593 | -0.7666417 | 0.02681167 | ETS2                        | v-ets erythroblastosis virus E26 oncogene homolog 2 (avian)                                 |
| 7892724 | -0.8385407 | 0.02679051 |                             |                                                                                             |
| 7950641 | -0.539566  | 0.02658105 | KCTD14                      | potassium channel tetramerisation domain containing 14                                      |
| 8083223 | -0.5763687 | 0.02649944 | C3orf58                     | chromosome 3 open reading frame 58                                                          |
| 7894834 | -0.5661113 | 0.02601247 |                             |                                                                                             |

|         |            |            |                 |                                                                                                                                       |
|---------|------------|------------|-----------------|---------------------------------------------------------------------------------------------------------------------------------------|
| 7917240 | -0.5111531 | 0.02595433 | CTBS            | chitobiase, di-N-acetyl-                                                                                                              |
| 7932794 | -0.5009931 | 0.02587694 |                 |                                                                                                                                       |
| 8156848 | -1.0400562 | 0.02572079 | NR4A3           | nuclear receptor subfamily 4, group A, member 3                                                                                       |
| 8131803 | -0.9824619 | 0.02549894 | IL6             | interleukin 6 (interferon, beta 2)                                                                                                    |
| 8129637 | -0.8157712 | 0.02539626 | VNN2            | vanin 2                                                                                                                               |
| 7962884 | -1.0891501 | 0.02528467 | RND1            | Rho family GTPase 1                                                                                                                   |
| 8160670 | -0.5044479 | 0.02527373 | AQP3            | aquaporin 3 (Gill blood group)                                                                                                        |
| 8089013 | -0.5000782 | 0.02501156 |                 |                                                                                                                                       |
| 7975268 | -0.7553863 | 0.02491772 | VTI1B///ARG2    | vesicle transport through interaction with t-SNAREs 1B///arginase 2                                                                   |
| 7894150 | -0.6609985 | 0.02482082 |                 |                                                                                                                                       |
| 8097801 | -0.6748175 | 0.02480175 | FAM160A1        | family with sequence similarity 160, member A1                                                                                        |
| 7948511 | -0.5670527 | 0.02467195 | VWCE            | von Willebrand factor C and EGF domains                                                                                               |
| 8097461 | -1.1067402 | 0.02462078 | CCRN4L///CCRN4L | CCR4 carbon catabolite repression 4-like ( <i>S. cerevisiae</i> )///CCR4 carbon catabolite repression 4-like ( <i>S. cerevisiae</i> ) |
| 7985025 | -0.7841578 | 0.02451442 | ODF3L1          | outer dense fiber of sperm tails 3-like 1                                                                                             |
| 8103023 | -0.5407848 | 0.02448072 |                 |                                                                                                                                       |
| 8162276 | -1.2466094 | 0.0243664  | NFIL3           | nuclear factor, interleukin 3 regulated                                                                                               |
| 7895752 | -0.5722766 | 0.02434932 |                 |                                                                                                                                       |
| 8130009 | -0.5111864 | 0.02430985 |                 |                                                                                                                                       |
| 7967331 | -0.5095312 | 0.02430367 | VPS37B          | vacuolar protein sorting 37 homolog B ( <i>S. cerevisiae</i> )                                                                        |
| 7896519 | -0.59685   | 0.02421754 |                 |                                                                                                                                       |
| 7965040 | -1.0712458 | 0.02417248 | PHLDA1          | pleckstrin homology-like domain, family A, member 1                                                                                   |
| 8146115 | -0.8207753 | 0.02414875 | C8orf4          | chromosome 8 open reading frame 4                                                                                                     |
| 8089112 | -0.7003057 | 0.02398271 | FILIP1L         | filamin A interacting protein 1-like                                                                                                  |
| 8132911 | -0.5201116 | 0.02390675 |                 |                                                                                                                                       |
| 7995342 | -0.5970376 | 0.02375308 |                 |                                                                                                                                       |
| 8098240 | -0.5631675 | 0.02356108 |                 |                                                                                                                                       |
| 8002760 | -0.534114  | 0.02347278 |                 |                                                                                                                                       |
| 7982805 | -0.6399177 | 0.02329391 | GCHFR           | GTP cyclohydrolase I feedback regulator                                                                                               |
| 8118667 | -0.5247041 | 0.02320314 | MYL12B          | myosin, light chain 12B, regulatory                                                                                                   |
| 7893619 | -0.5612938 | 0.02305155 |                 |                                                                                                                                       |

|         |            |            |                   |                                                                                                      |
|---------|------------|------------|-------------------|------------------------------------------------------------------------------------------------------|
| 7919751 | -0.5190224 | 0.02302389 | MCL1              | myeloid cell leukemia sequence 1 (BCL2-related)                                                      |
| 7922646 | -0.5169399 | 0.02288437 | TOR1AIP2          | torsin A interacting protein 2                                                                       |
| 7905503 | -0.5236343 | 0.02266108 | LCE2C             | late cornified envelope 2C                                                                           |
| 8066513 | -0.5882838 | 0.022509   | SDC4              | syndecan 4                                                                                           |
| 7893549 | -0.6736474 | 0.02244048 |                   |                                                                                                      |
| 8161648 | -0.6689779 | 0.02231988 | KLF9              | Kruppel-like factor 9                                                                                |
| 8020724 | -0.5041743 | 0.02231974 | DSG1              | desmoglein 1                                                                                         |
| 8079163 | -0.651555  | 0.02213083 |                   |                                                                                                      |
| 7965606 | -0.8933789 | 0.02202228 | HAL               | histidine ammonia-lyase                                                                              |
| 7928308 | -0.9609032 | 0.02197104 | DDIT4             | DNA-damage-inducible transcript 4                                                                    |
| 7895253 | -0.6840888 | 0.02161753 |                   |                                                                                                      |
| 7980990 | -0.5302789 | 0.02140291 | C14orf142///UBR7  | chromosome 14 open reading frame 142///ubiquitin protein ligase E3 component n-recognin 7 (putative) |
| 7893624 | -0.5827103 | 0.02134718 |                   |                                                                                                      |
| 7892573 | -0.6941269 | 0.02087303 |                   |                                                                                                      |
| 8080958 | -0.5722847 | 0.02083902 | GPR27             | G protein-coupled receptor 27                                                                        |
| 7926979 | -0.9146494 | 0.02064692 |                   |                                                                                                      |
| 8083136 | -0.6112498 | 0.02050294 | ATP1B3            | ATPase, Na <sup>+</sup> /K <sup>+</sup> transporting, beta 3 polypeptide                             |
| 7905929 | -0.5370957 | 0.0202485  | EFNA1             | ephrin-A1                                                                                            |
| 8095680 | -1.6588538 | 0.02005064 | IL8               | interleukin 8                                                                                        |
| 7894251 | -0.6504813 | 0.02002574 |                   |                                                                                                      |
| 8123637 | -0.8065788 | 0.02002004 | HTATSF1P2///NQO2  | HIV-1 Tat specific factor 1 pseudogene 2///NAD(P)H dehydrogenase, quinone 2                          |
| 7895972 | -0.5449425 | 0.019616   |                   |                                                                                                      |
| 8100202 | -0.7416219 | 0.01958113 | LOC280665///CNGA1 | anti-CNG alpha 1 cation channel translation product-like///cyclic nucleotide gated channel alpha 1   |
| 7975626 | -0.5177171 | 0.01953319 | ELMSAN1           | ELM2 and Myb/SANT-like domain containing 1                                                           |
| 7893539 | -0.8975014 | 0.01925281 |                   |                                                                                                      |
| 7982152 | -0.6358306 | 0.0192255  |                   |                                                                                                      |
| 7986661 | -0.6358306 | 0.0192255  |                   |                                                                                                      |
| 7986943 | -0.6358306 | 0.0192255  |                   |                                                                                                      |
| 7955719 | -0.6514739 | 0.01913438 | HIGD1A            | HIG1 hypoxia inducible domain family, member 1A                                                      |

|         |            |            |          |                                                                                               |
|---------|------------|------------|----------|-----------------------------------------------------------------------------------------------|
| 7934278 | -1.3558887 | 0.01840943 | P4HA1    | prolyl 4-hydroxylase, alpha polypeptide I                                                     |
| 7997712 | -0.8324761 | 0.01832857 | IRF8     | interferon regulatory factor 8                                                                |
| 8157264 | -0.5512394 | 0.01795087 | SLC31A2  | solute carrier family 31 (copper transporters), member 2                                      |
| 8180318 | -0.7306195 | 0.01787534 | TGIF1    | TGFB-induced factor homeobox 1                                                                |
| 8157605 | -0.7423595 | 0.01786786 |          |                                                                                               |
| 8110708 | -0.5156707 | 0.01761044 | TPPP     | tubulin polymerization promoting protein                                                      |
| 7895181 | -0.5854569 | 0.01758103 |          |                                                                                               |
| 7925436 | -0.6663342 | 0.01734027 |          |                                                                                               |
| 8169233 | -0.912351  | 0.01725385 |          |                                                                                               |
| 7896321 | -0.6130633 | 0.01724026 |          |                                                                                               |
| 7895153 | -0.7474846 | 0.01710029 |          |                                                                                               |
| 7905131 | -0.6031465 | 0.01706176 | CA14     | carbonic anhydrase XIV                                                                        |
| 8101699 | -0.7296946 | 0.01705999 | PPM1K    | protein phosphatase, Mg <sup>2+</sup> /Mn <sup>2+</sup> dependent, 1K                         |
| 8020630 | -0.555526  | 0.01698629 | TTC39C   | tetratricopeptide repeat domain 39C                                                           |
| 7895971 | -0.5919108 | 0.01687709 |          |                                                                                               |
| 8038877 | -0.5011044 | 0.01666189 | SIGLEC5  | sialic acid binding Ig-like lectin 5                                                          |
| 8088642 | -0.5171738 | 0.01660526 | LRIG1    | leucine-rich repeats and immunoglobulin-like domains 1                                        |
| 8135069 | -1.4897627 | 0.01657498 | SERPINE1 | serpin peptidase inhibitor, clade E (nexin, plasminogen activator inhibitor type 1), member 1 |
| 8035445 | -0.9767586 | 0.01640411 | JUND     | jun D proto-oncogene                                                                          |
| 7995324 | -0.5778227 | 0.01636985 |          |                                                                                               |
| 8117696 | -0.5012466 | 0.01621336 | COX11    | cytochrome c oxidase assembly homolog 11 (yeast)                                              |
| 7898655 | -0.5707078 | 0.01617006 | CDA      | cytidine deaminase                                                                            |
| 8049567 | -0.8612279 | 0.01616883 | RAMP1    | receptor (G protein-coupled) activity modifying protein 1                                     |
| 7957551 | -1.1219426 | 0.01615871 | SOCS2    | suppressor of cytokine signaling 2                                                            |
| 8132694 | -2.2791786 | 0.01606823 | IGFBP1   | insulin-like growth factor binding protein 1                                                  |
| 7924526 | -0.6776029 | 0.01599559 | TP53BP2  | tumor protein p53 binding protein, 2                                                          |
| 8099633 | -0.911251  | 0.01598597 | PPARGC1A | peroxisome proliferator-activated receptor gamma, coactivator 1 alpha                         |
| 8040465 | -0.6010055 | 0.0156272  |          |                                                                                               |
| 7895096 | -0.5173221 | 0.01555575 |          |                                                                                               |
| 8037267 | -0.5181162 | 0.01554196 | PSG2     | pregnancy specific beta-1-glycoprotein 2                                                      |

|         |            |            |          |                                                                                                 |
|---------|------------|------------|----------|-------------------------------------------------------------------------------------------------|
| 7895018 | -0.7159829 | 0.01538422 |          |                                                                                                 |
| 8180319 | -0.7330649 | 0.01515961 | TGIF1    | TGFB-induced factor homeobox 1                                                                  |
| 8001041 | -0.5067876 | 0.01503265 | COX6A2   | cytochrome c oxidase subunit VIa polypeptide 2                                                  |
| 7909142 | -0.5183588 | 0.01497523 | NUCKS1   | nuclear casein kinase and cyclin-dependent kinase substrate 1                                   |
| 7902687 | -1.557861  | 0.01484337 | CYR61    | cysteine-rich, angiogenic inducer, 61                                                           |
| 8161610 | -0.6272786 | 0.01462977 | TMEM252  | transmembrane protein 252                                                                       |
| 8041048 | -0.7030326 | 0.01427111 | FOSL2    | FOS-like antigen 2                                                                              |
| 8162624 | -0.8617888 | 0.01424785 | AAED1    | AhpC/TSA antioxidant enzyme domain containing 1                                                 |
| 7896094 | -0.5026811 | 0.01424766 |          |                                                                                                 |
| 8172573 | -0.5200627 | 0.0141162  | SYP      | synaptophysin                                                                                   |
| 8077441 | -0.5856049 | 0.0137106  | BHLHE40  | basic helix-loop-helix family, member e40                                                       |
| 8129666 | -0.6502501 | 0.01369339 | SLC2A12  | solute carrier family 2 (facilitated glucose transporter), member 12                            |
| 8135480 | -0.5743501 | 0.01368888 | DNAJB9   | DnaJ (Hsp40) homolog, subfamily B, member 9                                                     |
| 8169709 | -0.6243576 | 0.01356165 | GLRX5    | glutaredoxin 5                                                                                  |
| 8005233 | -0.7371269 | 0.01355073 |          |                                                                                                 |
| 7930413 | -0.5734406 | 0.01348248 | DUSP5    | dual specificity phosphatase 5                                                                  |
| 7892972 | -0.5202722 | 0.01338789 |          |                                                                                                 |
| 8161238 | -0.5278489 | 0.01333893 | RAB1C    | RAB1C, member RAS oncogene family pseudogene                                                    |
| 7972745 | -0.9618954 | 0.01330995 | IRS2     | insulin receptor substrate 2                                                                    |
| 7931810 | -1.1777713 | 0.01319082 | KLF6     | Kruppel-like factor 6                                                                           |
| 7905329 | -0.7448288 | 0.01315947 | MLLT11   | myeloid/lymphoid or mixed-lineage leukemia (trithorax homolog, Drosophila); translocated to, 11 |
| 7997245 | -0.5195405 | 0.01315311 |          |                                                                                                 |
| 7952408 | -0.5181652 | 0.01288741 | SIAE     | sialic acid acetyltransferase                                                                   |
| 8171837 | -0.6039273 | 0.01282218 | KLHL15   | kelch-like family member 15                                                                     |
| 8026163 | -0.9742234 | 0.0127873  | IER2     | immediate early response 2                                                                      |
| 8084880 | -0.9120429 | 0.01262678 | HES1     | hairy and enhancer of split 1, (Drosophila)                                                     |
| 8047217 | -0.6017006 | 0.01259853 | COQ10B   | coenzyme Q10 homolog B (S. cerevisiae)                                                          |
| 7894355 | -0.5704975 | 0.01253764 |          |                                                                                                 |
| 8030128 | -0.9275809 | 0.01247971 | PPP1R15A | protein phosphatase 1, regulatory subunit 15A                                                   |
| 8147687 | -1.0430902 | 0.01237213 |          |                                                                                                 |

|         |            |            |                |                                                                                                     |
|---------|------------|------------|----------------|-----------------------------------------------------------------------------------------------------|
| 7912670 | -0.5053147 | 0.01234246 | UQCRHL//UQCRH  | ubiquinol-cytochrome c reductase hinge protein-like//ubiquinol-cytochrome c reductase hinge protein |
| 8098414 | -0.5959358 | 0.01225687 | SPCS3          | signal peptidase complex subunit 3 homolog ( <i>S. cerevisiae</i> )                                 |
| 7940022 | -0.5615178 | 0.01224132 | RTN4RL2        | reticulon 4 receptor-like 2                                                                         |
| 8036557 | -0.5544486 | 0.01223905 |                |                                                                                                     |
| 7930304 | -0.559241  | 0.01206465 | GSTO1          | glutathione S-transferase omega 1                                                                   |
| 8069991 | -0.9647252 | 0.01201486 | TCP10L         | t-complex 10-like                                                                                   |
| 7981078 | -0.5528578 | 0.01194369 | SERPINA11      | serpin peptidase inhibitor, clade A (alpha-1 antiproteinase, antitrypsin), member 11                |
| 8073612 | -0.5782976 | 0.01169684 | TSPO           | translocator protein (18kDa)                                                                        |
| 7975779 | -3.1062307 | 0.01163103 | FOS            | FBJ murine osteosarcoma viral oncogene homolog                                                      |
| 8169210 | -0.6750321 | 0.01133256 | RIPPLY1//CLDN2 | rippy1 homolog (zebrafish)//claudin 2                                                               |
| 7922754 | -0.5123124 | 0.01119058 |                |                                                                                                     |
| 8085116 | -0.5231205 | 0.01113563 | EDEM1          | ER degradation enhancer, mannosidase alpha-like 1                                                   |
| 7894011 | -0.6595602 | 0.01109126 |                |                                                                                                     |
| 7948369 | -0.6224941 | 0.01107388 |                |                                                                                                     |
| 7936833 | -0.6788443 | 0.01100245 |                |                                                                                                     |
| 8048319 | -1.1036417 | 0.01099844 | VIL1           | villin 1                                                                                            |
| 7896417 | -0.9393753 | 0.01087103 |                |                                                                                                     |
| 8107100 | -0.6604493 | 0.01068623 | RGMB           | RGM domain family, member B                                                                         |
| 7952249 | -0.6475387 | 0.01065825 | USP2           | ubiquitin specific peptidase 2                                                                      |
| 7935679 | -0.5952875 | 0.01061368 | CPN1           | carboxypeptidase N, polypeptide 1                                                                   |
| 7895902 | -0.6566006 | 0.01059372 |                |                                                                                                     |
| 7960381 | -0.8570056 | 0.01048279 | EFCAB4B        | EF-hand calcium binding domain 4B                                                                   |
| 8158666 | -0.5631332 | 0.01042546 | HMCN2          | hemicentin 2                                                                                        |
| 7893679 | -0.6974431 | 0.01009726 |                |                                                                                                     |
| 8180317 | -0.7745188 | 0.01001805 | TGIF1          | TGFB-induced factor homeobox 1                                                                      |
| 8170633 | -0.5202442 | 0.00991461 |                |                                                                                                     |
| 8175773 | -0.5202442 | 0.00991461 |                |                                                                                                     |
| 8023920 | -0.5654173 | 0.0098425  | TXNL4A         | thioredoxin-like 4A                                                                                 |
| 8129562 | -1.0392902 | 0.00982472 | CTGF           | connective tissue growth factor                                                                     |

|         |            |            |                       |                                                                                     |
|---------|------------|------------|-----------------------|-------------------------------------------------------------------------------------|
| 7894927 | -0.6184132 | 0.0097476  |                       |                                                                                     |
| 7944006 | -0.5256585 | 0.0097416  | RBM7                  | RNA binding motif protein 7                                                         |
| 8174317 | -0.5018513 | 0.00971218 | RIPPLY1///CLDN<br>2   | rippy1 homolog (zebrafish)///claudin 2                                              |
| 7920971 | -0.5004468 | 0.00968247 | C1orf85               | chromosome 1 open reading frame 85                                                  |
| 7900146 | -0.6054041 | 0.00962244 | ZC3H12A               | zinc finger CCCH-type containing 12A                                                |
| 8005473 | -0.6776358 | 0.00949393 | PAIP1                 | poly(A) binding protein interacting protein 1                                       |
| 8040949 | -0.5497365 | 0.00947382 | KRTCAP3               | keratinocyte associated protein 3                                                   |
| 8088167 | -0.7504385 | 0.00932867 | SELK                  | selenoprotein K                                                                     |
| 7982868 | -1.6189369 | 0.00926747 | CHAC1                 | ChaC, cation transport regulator homolog 1 (E. coli)                                |
| 7940005 | -0.5172225 | 0.00924398 | P2RX3                 | purinergic receptor P2X, ligand-gated ion channel, 3                                |
| 7892720 | -0.6611917 | 0.00922895 |                       |                                                                                     |
| 8079117 | -0.7616835 | 0.0091924  | CCBP2                 | chemokine binding protein 2                                                         |
| 7910790 | -0.5768458 | 0.00918347 |                       |                                                                                     |
| 7893126 | -0.5131467 | 0.00908238 |                       |                                                                                     |
| 7892603 | -0.7452149 | 0.00907764 |                       |                                                                                     |
| 8125919 | -0.749642  | 0.00872981 | LOC285847///FK<br>BP5 | uncharacterized LOC285847///FK506 binding protein 5                                 |
| 7978644 | -0.5122395 | 0.00866376 | NFKBIA                | nuclear factor of kappa light polypeptide gene enhancer in B-cells inhibitor, alpha |
| 8148317 | -1.7295414 | 0.00860086 | MYC                   | v-myc myelocytomatosis viral oncogene homolog (avian)                               |
| 7972062 | -0.509053  | 0.00859662 | FBXL3                 | F-box and leucine-rich repeat protein 3                                             |
| 8158147 | -1.1850816 | 0.00848416 | SLC25A25              | solute carrier family 25 (mitochondrial carrier; phosphate carrier), member 25      |
| 7915084 | -0.5322192 | 0.0083308  | YRDC                  | yrdC domain containing (E. coli)                                                    |
| 8036031 | -0.5119172 | 0.00818485 |                       |                                                                                     |
| 8104022 | -0.6554738 | 0.00817239 | PDLIM3                | PDZ and LIM domain 3                                                                |
| 8146837 | -0.6320494 | 0.00813753 |                       |                                                                                     |
| 7914000 | -1.2176968 | 0.00780265 | NR0B2                 | nuclear receptor subfamily 0, group B, member 2                                     |
| 7903474 | -0.6975002 | 0.00761564 |                       |                                                                                     |
| 7977340 | -0.6177072 | 0.00754527 | BTBD6                 | BTB (POZ) domain containing 6                                                       |
| 8112613 | -0.5939775 | 0.00753922 |                       |                                                                                     |

|         |            |            |                     |                                                                  |
|---------|------------|------------|---------------------|------------------------------------------------------------------|
| 7893298 | -1.0096467 | 0.0074884  |                     |                                                                  |
| 8180316 | -0.8113979 | 0.00735825 | TGIF1               | TGFB-induced factor homeobox 1                                   |
| 8032051 | -0.5042038 | 0.00735484 | ODF3L2              | outer dense fiber of sperm tails 3-like 2                        |
| 8043682 | -0.640999  | 0.00734006 | LOC653924           | glycerol-3-phosphate acyltransferase 2, mitochondrial pseudogene |
| 8098604 | -1.1952098 | 0.00727542 | ANKRD37///UFS<br>P2 | ankyrin repeat domain 37///UFM1-specific peptidase 2             |
| 8150592 | -0.9439291 | 0.00714897 | CEBPD               | CCAAT/enhancer binding protein (C/EBP), delta                    |
| 7894044 | -0.7091508 | 0.00705606 |                     |                                                                  |
| 8172654 | -0.508338  | 0.00697757 | USP27X-AS1          | USP27X antisense RNA 1 (head to head)                            |
| 7909610 | -0.8813908 | 0.00684213 | ATF3                | activating transcription factor 3                                |
| 8161747 | -0.9600115 | 0.0067433  | ZFAND5              | zinc finger, AN1-type domain 5                                   |
| 7894504 | -0.9191786 | 0.00653694 |                     |                                                                  |
| 8019181 | -0.5044239 | 0.00650815 | LOC100130370        | uncharacterized LOC100130370                                     |
| 7999171 | -0.5298296 | 0.00648403 |                     |                                                                  |
| 8089011 | -0.6140443 | 0.00637289 | PROS1               | protein S (alpha)                                                |
| 7966621 | -1.0826975 | 0.00624578 | SDS                 | serine dehydratase                                               |
| 8042107 | -0.505525  | 0.00621517 | EIF3F               | eukaryotic translation initiation factor 3, subunit F            |
| 7896709 | -0.5891329 | 0.00609846 |                     |                                                                  |
| 7961702 | -0.5437303 | 0.00609408 | KCNJ8               | potassium inwardly-rectifying channel, subfamily J, member 8     |
| 7895382 | -0.5011747 | 0.0060812  |                     |                                                                  |
| 8063386 | -0.5096244 | 0.00599746 | CEBPB               | CCAAT/enhancer binding protein (C/EBP), beta                     |
| 7972808 | -0.5264641 | 0.0058608  | CARKD               | carbohydrate kinase domain containing                            |
| 8097655 | -0.5696299 | 0.00578451 |                     |                                                                  |
| 7970241 | -0.5199536 | 0.00577709 | F10                 | coagulation factor X                                             |
| 7971905 | -1.0694951 | 0.0057561  | PCDH20              | protocadherin 20                                                 |
| 8019018 | -0.5099874 | 0.00573586 | CBX4                | chromobox homolog 4                                              |
| 8067585 | -0.51639   | 0.00563615 | BHLHE23             | basic helix-loop-helix family, member e23                        |
| 8037535 | -0.5400099 | 0.0056105  |                     |                                                                  |
| 8006562 | -0.5001347 | 0.0055153  | RASL10B             | RAS-like, family 10, member B                                    |
| 8055688 | -1.0036864 | 0.00551162 | RND3///RND3         | Rho family GTPase 3///Rho family GTPase 3                        |
| 7922162 | -0.7869264 | 0.00543319 | SLC19A2             | solute carrier family 19 (thiamine transporter), member 2        |



|         |            |            |               |                                                                                |
|---------|------------|------------|---------------|--------------------------------------------------------------------------------|
| 8103411 | -0.5945646 | 0.00534533 |               |                                                                                |
| 8035398 | -0.6693598 | 0.00529873 | RAB3A         | RAB3A, member RAS oncogene family                                              |
| 8156309 | -1.942502  | 0.00512409 | GADD45G       | growth arrest and DNA-damage-inducible, gamma                                  |
| 7925950 | -0.5820151 | 0.00509919 | UCN3          | urocortin 3                                                                    |
| 8012000 | -0.6022922 | 0.00504722 | RNASEK        | ribonuclease, RNase K                                                          |
| 7925128 | -0.6265545 | 0.00501531 |               |                                                                                |
| 7995332 | -0.6412533 | 0.00501272 |               |                                                                                |
| 7895999 | -0.8687445 | 0.00499013 |               |                                                                                |
| 8055952 | -2.5584412 | 0.00498481 | NR4A2         | nuclear receptor subfamily 4, group A, member 2                                |
| 8148304 | -1.373629  | 0.0048999  | TRIB1         | tribbles homolog 1 (Drosophila)                                                |
| 7892679 | -0.8871725 | 0.00484137 |               |                                                                                |
| 8027390 | -0.6265696 | 0.00483507 | POP4          | processing of precursor 4, ribonuclease P/MRP subunit ( <i>S. cerevisiae</i> ) |
| 8070665 | -2.3281082 | 0.00474742 | SIK1          | salt-inducible kinase 1                                                        |
| 8132897 | -0.5130256 | 0.00471586 | LANCL2        | LanC lantibiotic synthetase component C-like 2 (bacterial)                     |
| 8057599 | -0.5230052 | 0.00468373 | TFPI          | tissue factor pathway inhibitor (lipoprotein-associated coagulation inhibitor) |
| 8022404 | -0.5433508 | 0.0046037  | FAM210A       | family with sequence similarity 210, member A                                  |
| 7966321 | -0.5279674 | 0.00440399 | GPN3          | GPN-loop GTPase 3                                                              |
| 7902290 | -0.9388264 | 0.0043602  | CTH           | cystathionase (cystathionine gamma-lyase)                                      |
| 8169352 | -0.5938875 | 0.00429821 | NXT2          | nuclear transport factor 2-like export factor 2                                |
| 7926531 | -0.8595449 | 0.00411893 | ARL5B         | ADP-ribosylation factor-like 5B                                                |
| 7993185 | -0.5111652 | 0.00403429 | NUBP1///NUBP1 | nucleotide binding protein 1///nucleotide binding protein 1                    |
| 8174026 | -0.5870262 | 0.00398512 | YWHAQP8       | YWHAQ pseudogene 8                                                             |
| 8173613 | -0.5310673 | 0.00384878 | RLIM          | ring finger protein, LIM domain interacting                                    |
| 8178435 | -1.438055  | 0.0038228  | IER3          | immediate early response 3                                                     |
| 7974870 | -0.5458739 | 0.00368974 | SNAPC1        | small nuclear RNA activating complex, polypeptide 1, 43kDa                     |
| 8154848 | -0.5153887 | 0.0035797  | PRSS3///PRSS2 | protease, serine, 3///protease, serine, 2 (trypsin 2)                          |
| 8030999 | -0.7943339 | 0.00357783 | ZNF331        | zinc finger protein 331                                                        |
| 8025828 | -1.1722057 | 0.00340036 | LDLR          | low density lipoprotein receptor                                               |
| 8124848 | -1.3782396 | 0.00331477 | IER3          | immediate early response 3                                                     |
| 8179704 | -1.3782396 | 0.00331477 | IER3          | immediate early response 3                                                     |
| 7961371 | -0.5740814 | 0.00330602 | DUSP16        | dual specificity phosphatase 16                                                |

|         |            |            |                      |                                                                                                                                        |
|---------|------------|------------|----------------------|----------------------------------------------------------------------------------------------------------------------------------------|
| 7997257 | -0.5769866 | 0.003299   | ZFP1                 | ZFP1 zinc finger protein                                                                                                               |
| 8040362 | -0.7043592 | 0.0032778  |                      |                                                                                                                                        |
| 7933723 | -0.5314434 | 0.00324096 | IPMK                 | inositol polyphosphate multikinase                                                                                                     |
| 8040103 | -0.557687  | 0.00317976 | ID2                  | inhibitor of DNA binding 2, dominant negative helix-loop-helix protein                                                                 |
| 8111136 | -0.9999708 | 0.00315831 | FAM134B              | family with sequence similarity 134, member B                                                                                          |
| 7925813 | -0.5986176 | 0.00301798 | PRR26                | proline rich 26                                                                                                                        |
| 8095341 | -0.5490133 | 0.0029586  |                      |                                                                                                                                        |
| 7955589 | -2.0511401 | 0.00295384 | NR4A1                | nuclear receptor subfamily 4, group A, member 1                                                                                        |
| 8096077 | -1.0598142 | 0.00294631 |                      |                                                                                                                                        |
| 7933084 | -0.9884506 | 0.00294457 | NAMPT                | nicotinamide phosphoribosyltransferase                                                                                                 |
| 7903765 | -3.6307022 | 0.00293094 | GSTM1                | glutathione S-transferase mu 1                                                                                                         |
| 7946812 | -0.614843  | 0.00292128 | RPS13                | ribosomal protein S13                                                                                                                  |
| 7939492 | -0.6518034 | 0.0028591  | C11orf96             | chromosome 11 open reading frame 96                                                                                                    |
| 8067167 | -0.7614868 | 0.00276895 | AURKA                | aurora kinase A                                                                                                                        |
| 7928218 | -0.8185629 | 0.00275002 | CDH23                | cadherin-related 23                                                                                                                    |
| 7922523 | -0.797314  | 0.00271326 |                      |                                                                                                                                        |
| 8172028 | -0.6359934 | 0.00268484 |                      |                                                                                                                                        |
| 8029693 | -2.9348651 | 0.00262087 | FOSB//FOSB           | FBJ murine osteosarcoma viral oncogene homolog B//FBJ murine osteosarcoma viral oncogene homolog B                                     |
| 8174675 | -0.5367945 | 0.00259115 | SLC25A5-AS1//SLC25A5 | SLC25A5 antisense RNA 1//solute carrier family 25 (mitochondrial carrier; adenine nucleotide translocator), member 5                   |
| 8012349 | -0.7535384 | 0.00254145 | PER1                 | period circadian clock 1                                                                                                               |
| 7937330 | -0.8171266 | 0.00250968 | IFITM2               | interferon induced transmembrane protein 2                                                                                             |
| 8029489 | -0.663212  | 0.00248663 | BCAM                 | basal cell adhesion molecule (Lutheran blood group)                                                                                    |
| 8101648 | -0.6841494 | 0.00243953 | HSD17B11             | hydroxysteroid (17-beta) dehydrogenase 11                                                                                              |
| 8029507 | -0.5266168 | 0.00240123 | PVRL2                | poliovirus receptor-related 2 (herpesvirus entry mediator B)                                                                           |
| 7979725 | -0.7505446 | 0.00239189 | PLEKHH1//PIG H       | pleckstrin homology domain containing, family H (with MyTH4 domain) member 1//phosphatidylinositol glycan anchor biosynthesis, class H |
| 7894268 | -0.8288593 | 0.00232915 |                      |                                                                                                                                        |
| 8041561 | -0.7959762 | 0.00223816 | MORN2                | MORN repeat containing 2                                                                                                               |
| 8028652 | -1.3113392 | 0.00223097 | ZFP36                | ZFP36 ring finger protein                                                                                                              |
| 8142120 | -0.9682252 | 0.00217904 | NAMPT                | nicotinamide phosphoribosyltransferase                                                                                                 |

|         |            |            |          |                                                |
|---------|------------|------------|----------|------------------------------------------------|
| 8137526 | -0.8492435 | 0.00204108 | INSIG1   | insulin induced gene 1                         |
| 7938368 | -0.6384895 | 0.00203324 |          |                                                |
| 8152355 | -0.8615485 | 0.00189246 | SYBU     | syntabulin (syntaxin-interacting)              |
| 8024485 | -1.3214196 | 0.00188706 | GADD45B  | growth arrest and DNA-damage-inducible, beta   |
| 7908492 | -1.0886007 | 0.00186775 | CFHR4    | complement factor H-related 4                  |
| 8081036 | -0.8189429 | 0.00186143 | CADM2    | cell adhesion molecule 2                       |
| 8043743 | -0.760129  | 0.00184812 |          |                                                |
| 7962537 | -1.0666454 | 0.00183031 | SLC38A2  | solute carrier family 38, member 2             |
| 8121794 | -0.7571479 | 0.0016584  | SMPDL3A  | sphingomyelin phosphodiesterase, acid-like 3A  |
| 8180275 | -0.7503167 | 0.00162874 | PCDHA1   | protocadherin alpha 1                          |
| 7984008 | -0.6859241 | 0.00162347 |          |                                                |
| 8044927 | -0.8365517 | 0.0016032  | INHBB    | inhibin, beta B                                |
| 7979886 | -0.5707307 | 0.00155642 |          |                                                |
| 8180222 | -0.7096629 | 0.00141562 | CFHR4    | complement factor H-related 4                  |
| 7989611 | -0.6765881 | 0.00141216 | FAM96A   | family with sequence similarity 96, member A   |
| 7892628 | -0.8015319 | 0.00137203 |          |                                                |
| 8152092 | -0.5892402 | 0.00134498 |          |                                                |
| 8013804 | -0.572136  | 0.00128594 | DHRS13   | dehydrogenase/reductase (SDR family) member 13 |
| 8086330 | -2.0182867 | 0.00127648 | CSRNP1   | cysteine-serine-rich nuclear protein 1         |
| 7907655 | -0.6926461 | 0.00124199 |          |                                                |
| 8040473 | -0.8076007 | 0.00121427 | RHOB     | ras homolog family member B                    |
| 7893001 | -0.6500947 | 0.00119276 |          |                                                |
| 7895866 | -1.0788601 | 0.0010307  |          |                                                |
| 7908499 | -1.0418966 | 0.00101041 | CFHR5    | complement factor H-related 5                  |
| 8036902 | -0.6477393 | 0.00100621 | SERTAD1  | SERTA domain containing 1                      |
| 8154381 | -0.8986643 | 0.00096913 | LURAP1L  | leucine rich adaptor protein 1-like            |
| 7894916 | -0.754135  | 0.00096797 |          |                                                |
| 7893573 | -0.8512393 | 0.00095348 |          |                                                |
| 8094938 | -0.8446494 | 0.00094038 | NIPAL1   | NIPA-like domain containing 1                  |
| 7918379 | -1.4814585 | 0.00093872 | GSTM3    | glutathione S-transferase mu 3 (brain)         |
| 8001658 | -0.5927376 | 0.00093362 | C16orf80 | chromosome 16 open reading frame 80            |

|         |            |            |              |                                                   |
|---------|------------|------------|--------------|---------------------------------------------------|
| 8040898 | -0.6531517 | 0.00081725 | TRIM54       | tripartite motif containing 54                    |
| 8067955 | -0.5005392 | 0.00081431 | CXADR        | coxsackie virus and adenovirus receptor           |
| 8069574 | -0.7558377 | 0.00077717 | C21orf91     | chromosome 21 open reading frame 91               |
| 7966631 | -0.5445128 | 0.00076753 | LHX5         | LIM homeobox 5                                    |
| 8152642 | -0.5413285 | 0.00073658 | FAM83A-AS1   | FAM83A antisense RNA 1                            |
| 7967789 | -0.7403421 | 0.00069574 | PXMP2        | peroxisomal membrane protein 2, 22kDa             |
| 7938348 | -0.8505695 | 0.00065689 | WEE1         | WEE1 homolog ( <i>S. pombe</i> )                  |
| 7892578 | -0.8435877 | 0.0006426  |              |                                                   |
| 8034698 | -1.1453674 | 0.00063646 | MIR23A       | microRNA 23a                                      |
| 7899018 | -0.6029719 | 0.00062051 | TMEM57       | transmembrane protein 57                          |
| 8174361 | -1.106472  | 0.00060989 | TSC22D3      | TSC22 domain family, member 3                     |
| 8098782 | -0.5700646 | 0.00059797 | CPLX1        | complexin 1                                       |
| 8104136 | -0.5954666 | 0.00059212 | HMX1         | H6 family homeobox 1                              |
| 8123800 | -0.5816688 | 0.00058563 |              |                                                   |
| 8044574 | -1.3848874 | 0.0005679  | IL1RN        | interleukin 1 receptor antagonist                 |
| 8083569 | -0.9208159 | 0.00052665 | TIPARP       | TCDD-inducible poly(ADP-ribose) polymerase        |
| 7980096 | -1.1163776 | 0.00039858 |              |                                                   |
| 8140140 | -0.8820648 | 0.00033407 | CLDN3        | claudin 3                                         |
| 7910901 | -0.6191243 | 0.00023535 | LOC100130331 | POTE ankyrin domain family, member F pseudogene   |
| 7924058 | -0.665233  | 0.00022223 | IRF6         | interferon regulatory factor 6                    |
| 8122732 | -0.7559958 | 0.00018761 |              |                                                   |
| 8167356 | -0.6303869 | 0.00013855 | GLOD5        | glyoxalase domain containing 5                    |
| 8016739 | -0.7544581 | 0.00012199 | TOB1         | transducer of ERBB2, 1                            |
| 8115831 | -1.5515257 | 0.00011364 | DUSP1        | dual specificity phosphatase 1                    |
| 7916225 | -0.7647516 | 0.00008812 | RPS13        | ribosomal protein S13                             |
| 8095744 | -0.9472907 | 0.00008362 | AREG         | amphiregulin                                      |
| 8121850 | -1.0823673 | 0.00002243 | HEY2         | hairy/enhancer-of-split related with YRPW motif 2 |
| 7907970 | -0.7411929 | 0.00001231 |              |                                                   |

Affymetrix Human Gene 1.1 ST Array was used for mRNA profile analysis.

**Supporting Table 2. 48 potential target genes of miR-24.**

| <b>miRNA Name</b> | <b>Gene Name</b> | <b>NCBI Ref.</b> | <b>Read<br/>Num of<br/>HITClip</b> | <b>TargetScanSites</b> | <b>PicTarSites</b> | <b>RNA22Sites</b> | <b>PITASites</b> | <b>miRandaSites</b> |
|-------------------|------------------|------------------|------------------------------------|------------------------|--------------------|-------------------|------------------|---------------------|
| mmu-miR-24        | Yod1             | NM_178691        | 23229                              | 1(47)                  | 1(47)              | 0(0)              | 1(47)            | 1(47)               |
| mmu-miR-24        | Ugcg             | NM_011673        | 23229                              | 1(211)                 | 1(211)             | 0(0)              | 1(211)           | 1(211)              |
| mmu-miR-24        | Tnks             | NM_175091        | 23229                              | 1(143)                 | 2(232)             | 0(0)              | 0(0)             | 0(0)                |
| mmu-miR-24        | Sptlc2           | NM_011479        | 23229                              | 1(613)                 | 1(613)             | 0(0)              | 1(613)           | 1(613)              |
| mmu-miR-24        | Sp1              | NM_013672        | 23229                              | 1(85)                  | 2(124)             | 0(0)              | 1(85)            | 1(85)               |
| mmu-miR-24        | Snn              | NM_009223        | 23229                              | 1(679)                 | 1(679)             | 0(0)              | 1(679)           | 1(679)              |
| mmu-miR-24        | Rnf2             | NM_011277        | 23229                              | 1(48)                  | 1(48)              | 0(0)              | 1(48)            | 1(48)               |
| mmu-miR-24        | Rnf138           | NM_207623        | 23229                              | 1(21)                  | 1(21)              | 0(0)              | 1(21)            | 1(22)               |
| mmu-miR-24        | Ptprd            | NM_001014288     | 23229                              | 1(46)                  | 1(46)              | 1(46)             | 1(46)            | 1(46)               |
| mmu-miR-24        | Ogt              | NM_139144        | 23229                              | 1(242)                 | 1(242)             | 0(0)              | 1(242)           | 1(242)              |
| mmu-miR-24        | Ndst1            | NM_008306        | 23229                              | 1(68)                  | 1(68)              | 2(118)            | 0(0)             | 0(0)                |
| mmu-miR-24        | Matr3            | NM_010771        | 23229                              | 1(150)                 | 1(150)             | 0(0)              | 1(150)           | 1(150)              |
| mmu-miR-24        | Klf6             | NM_011803        | 23229                              | 1(74)                  | 1(74)              | 0(0)              | 1(74)            | 1(74)               |
| mmu-miR-24        | Igfbp5           | NM_010518        | 23229                              | 1(455)                 | 5(1077)            | 0(0)              | 1(455)           | 0(0)                |
| mmu-miR-24        | Gria3            | NM_016886        | 23229                              | 1(1733)                | 1(1733)            | 0(0)              | 1(1733)          | 0(0)                |

|            |           |              |       |        |        |        |        |        |
|------------|-----------|--------------|-------|--------|--------|--------|--------|--------|
| mmu-miR-24 | Fscn1     | NM_007984    | 23229 | 1(3)   | 2(32)  | 0(0)   | 1(3)   | 1(3)   |
| mmu-miR-24 | Ell       | NM_007924    | 23229 | 1(69)  | 1(69)  | 0(0)   | 0(0)   | 0(0)   |
| mmu-miR-24 | Dyrk2     | NM_001014390 | 23229 | 1(84)  | 1(84)  | 0(0)   | 1(84)  | 1(84)  |
| mmu-miR-24 | Dtna      | NM_207650    | 23229 | 1(52)  | 2(81)  | 0(0)   | 0(0)   | 0(0)   |
| mmu-miR-24 | D4Ertd22e | NM_001025608 | 23229 | 1(68)  | 1(68)  | 0(0)   | 0(0)   | 0(0)   |
| mmu-miR-24 | Cxadr     | NM_001025192 | 23229 | 1(102) | 2(308) | 0(0)   | 0(0)   | 0(0)   |
| mmu-miR-24 | Cnot6     | NM_212484    | 23229 | 1(48)  | 1(48)  | 0(0)   | 1(48)  | 1(48)  |
| mmu-miR-24 | Clcn3     | NM_173876    | 23229 | 1(87)  | 1(87)  | 0(0)   | 0(0)   | 1(87)  |
| mmu-miR-24 | Bcl2l2    | NM_007537    | 23229 | 1(424) | 1(424) | 1(424) | 1(424) | 1(424) |
| mmu-miR-24 | Agpat3    | NM_053014    | 23229 | 1(40)  | 1(40)  | 0(0)   | 0(0)   | 0(0)   |
| mmu-miR-24 | Acvr1b    | NM_007395    | 23229 | 1(61)  | 4(285) | 0(0)   | 2(70)  | 2(70)  |
| hsa-miR-24 | ZXDA      | NM_007156    | 2490  | 1(3)   | 1(3)   | 0(0)   | 1(3)   | 1(3)   |
| hsa-miR-24 | ZNF217    | NM_006526    | 2490  | 1(3)   | 1(3)   | 1(3)   | 1(3)   | 0(0)   |
| hsa-miR-24 | TOP1      | NM_003286    | 2490  | 1(3)   | 1(3)   | 0(0)   | 1(3)   | 1(3)   |
| hsa-miR-24 | SYS1      | NM_033542    | 2490  | 1(3)   | 1(3)   | 0(0)   | 0(0)   | 0(0)   |
| hsa-miR-24 | SSH2      | NM_033389    | 2490  | 1(22)  | 1(22)  | 0(0)   | 0(0)   | 0(0)   |
| hsa-miR-24 | SESN1     | NM_014454    | 2490  | 1(52)  | 1(52)  | 0(0)   | 1(52)  | 1(52)  |
| hsa-miR-24 | RNF2      | NM_007212    | 2490  | 1(7)   | 1(7)   | 0(0)   | 1(7)   | 1(7)   |

|            |          |              |      |        |        |      |        |        |
|------------|----------|--------------|------|--------|--------|------|--------|--------|
| hsa-miR-24 | RNF138   | NM_198128    | 2490 | 1(10)  | 1(10)  | 0(0) | 0(0)   | 0(0)   |
| hsa-miR-24 | RAP2C    | NM_021183    | 2490 | 1(5)   | 2(9)   | 0(0) | 1(5)   | 0(0)   |
| hsa-miR-24 | RAB5B    | NM_002868    | 2490 | 1(2)   | 1(2)   | 0(0) | 1(2)   | 1(2)   |
| hsa-miR-24 | NET1     | NM_005863    | 2490 | 1(5)   | 1(5)   | 0(0) | 0(0)   | 0(0)   |
| hsa-miR-24 | MBD6     | NM_052897    | 2490 | 1(5)   | 1(5)   | 0(0) | 1(5)   | 1(5)   |
| hsa-miR-24 | INSIG1   | NM_198337    | 2490 | 1(38)  | 1(38)  | 0(0) | 1(38)  | 0(0)   |
| hsa-miR-24 | H2AFX    | NM_002105    | 2490 | 1(226) | 1(226) | 0(0) | 0(0)   | 1(226) |
| hsa-miR-24 | FAM175B  | NM_032182    | 2490 | 1(2)   | 1(2)   | 0(0) | 0(0)   | 0(0)   |
| hsa-miR-24 | ELL      | NM_006532    | 2490 | 1(2)   | 1(2)   | 0(0) | 0(0)   | 0(0)   |
| hsa-miR-24 | DNAJB12  | NM_001002762 | 2490 | 1(16)  | 1(16)  | 0(0) | 1(16)  | 0(0)   |
| hsa-miR-24 | CNOT6    | NM_015455    | 2490 | 1(8)   | 1(8)   | 0(0) | 1(8)   | 1(8)   |
| hsa-miR-24 | CDV3     | NM_017548    | 2490 | 1(1)   | 2(3)   | 0(0) | 0(0)   | 1(1)   |
| hsa-miR-24 | CDKN1B   | NM_004064    | 2490 | 1(25)  | 1(25)  | 0(0) | 1(25)  | 0(0)   |
| hsa-miR-24 | C22orf13 | NM_031444    | 2490 | 1(17)  | 1(17)  | 0(0) | 0(0)   | 0(0)   |
| hsa-miR-24 | BCL2L11  | NM_138621    | 2490 | 1(100) | 1(100) | 0(0) | 1(100) | 0(0)   |

---

**Supporting Table 3. Three Down-regulated Genes in Livers of Human NAFLD/NASH that have Binding Motifs for miR-24**

| <b>miRNA Name</b> | <b>NCBI Ref</b> | <b>ReadNum of HIT-Clip</b> | <b>TargetScan Sites</b> | <b>PicTar Sites</b> | <b>P-Value</b> | <b>LogFC NAFLD/NSH</b> | <b>Gene Symbol</b> | <b>Gene Name</b>                        |
|-------------------|-----------------|----------------------------|-------------------------|---------------------|----------------|------------------------|--------------------|-----------------------------------------|
| miR-24            | NM_011803       | 23229                      | 1(74)                   | 1(74)               | 0.01319        | -1.1777713             | KLF6               | Kruppel-like factor 6                   |
| miR-24            | NM_198337       | 2490                       | 1(38)                   | 1(38)               | 0.002041       | -0.8492435             | INSIG1             | Insulin induced gene 1                  |
| miR-24            | NM_001025192    | 23229                      | 1(102)                  | 2(308)              | 0.000814       | -0.5005392             | CXADR              | Coxsackie virus and adenovirus receptor |



**Supporting Table 4. Primers for quantitative RT-PCR**

| <b>Gene symbol</b> | <b>Accession No.</b> | <b>Forward Primer</b>  | <b>Reverse Primer</b>   |
|--------------------|----------------------|------------------------|-------------------------|
| Insig1             | NM_005542            | TTTTCTCAGGAGGCGTCACGGT | TCCTTGCTCTCAGAATCGGTGG  |
| FASN               | NM_004104            | TTCTACGGCTCCACGCTCTTCC | GAAGAGTCTTCGTCAGCCAGGA  |
| SCD1               | NM_005063            | CCTGGTTTCACTTGGAGCTGTG | TGTGGTGAAGTTGATGTGCCAGC |
| GPAT               | NM_020918            | TTGTGGCTTGCCTGCTCCTCTA | AATCACGAGCCAGGACTTCCTC  |
| HMGCR              | NM_000859            | GACGTGAACCTATGCTGGTCAG | GGTATCTGTTTCAGCCACTAAGG |
| 18S                | X03205               | CAGGGTTCGATTCCGTAGAG   | CCTCCAGTGGATCCTCGTTA    |
| GAPDH              | NM_002046            | GTCTCCTCTGACTTCAACAGCG | ACCACCCTGTTGCTGTAGCCAA  |

**Supporting Table 5. Comparison of miR-24-ASO and miR-24-MM-ASO Treated Mice**

| Parameter                               | Scrambled treated mice | miR-24-ASO treated mice |
|-----------------------------------------|------------------------|-------------------------|
| Body weight (g)                         | 39±2                   | 38±1                    |
| Liver weight                            | 2.3±0.2                | 2.1±0.2                 |
| Liver cholesterol concentration (mg/g)  | 4.5±0.3                | 4.4±0.2                 |
| Liver triglyceride concentration (mg/g) | 138±23                 | 79±9.7                  |
| Total plasma cholesterol(mg/dl)         | 153±21                 | 134±19.7                |
| Total plasma triglycerides (mg/dl)      | 134±23.4               | 94±4.3                  |

Two-week-old mice (five in each group) maintained on HFD for 10 weeks were injected with miR-24-ASO or scramble for 4 weeks.
